# Supplementary material
Source: PubMed Central journal article supplement (PMC11114712)
Supplement: 18_2012_937_MOESM5_ESM.pdf [file 18_2012_937_MOESM5_ESM.pdf]

[HELP](#)**Description of the problem:**

Number of classes: 2  
 Number of genes used for random variance estimation: 31099  
 Number of genes that passed filtering criteria: 10067  
 Type of univariate test used: Two-sample T-test (with random variance model)  
 Column of the Experiment Descriptors sheet that defines class variable : ctrlvsdiff

Nominal significance level of each univariate test: 0.001

**Summary of Results:**

Number of genes significant at 0.001 level of the univariate test: 379

**Genes which discriminate among classes:**

Table 1 - Sorted by p-value of the univariate test.  
 The first 379 genes are significant at the nominal 0.001 level of the univariate test

|    | Parametric p-value | FDR       | Geom mean of intensities in class 1 : 0 | Geom mean of intensities in class 2 : 1 | Fold difference of geom means | Probe set                    | Description                                                                             | Annotations          | Gene symbol                      |
|----|--------------------|-----------|-----------------------------------------|-----------------------------------------|-------------------------------|------------------------------|-----------------------------------------------------------------------------------------|----------------------|----------------------------------|
| 1  | < 1e-07            | < 1e-07   | 508.2                                   | 15.3                                    | 33.216                        | <a href="#">1386965_at</a>   | lipoprotein lipase                                                                      | <a href="#">Info</a> | <a href="#">Lpl</a>              |
| 2  | < 1e-07            | < 1e-07   | 10                                      | 495.9                                   | 0.02                          | <a href="#">1385722_at</a>   | Transcribed locus, weakly similar to NP_035507.1 single-minded homolog 2 [Mus musculus] | <a href="#">Info</a> |                                  |
| 3  | 1e-07              | 0.0003356 | 276.7                                   | 9.2                                     | 30.076                        | <a href="#">1389253_at</a>   | vanin 1 (predicted)                                                                     | <a href="#">Info</a> | <a href="#">Vnn1_predicted</a>   |
| 4  | 2e-07              | 0.0004027 | 10.4                                    | 123.9                                   | 0.084                         | <a href="#">1379411_at</a>   | similar to ENSANGP00000020885                                                           | <a href="#">Info</a> | <a href="#">LOC306366</a>        |
| 5  | 2e-07              | 0.0004027 | 299                                     | 20                                      | 14.95                         | <a href="#">1372989_at</a>   | Transcribed locus                                                                       | <a href="#">Info</a> |                                  |
| 6  | 7e-07              | 0.0011745 | 134                                     | 11                                      | 12.182                        | <a href="#">1382453_at</a>   | Similar to Zinc finger protein ZIC 3 (Zinc finger protein of the cerebellum 3)          | <a href="#">Info</a> |                                  |
| 7  | 9e-07              | 0.0012943 | 111.8                                   | 23.8                                    | 4.697                         | <a href="#">1388255_x_at</a> | RT1 class I, CE5                                                                        | <a href="#">Info</a> | <a href="#">RT1-CE5</a>          |
| 8  | 1.9e-06            | 0.0023909 | 23.6                                    | 361.3                                   | 0.065                         | <a href="#">1387715_at</a>   | extracellular peptidase inhibitor                                                       | <a href="#">Info</a> | <a href="#">Expi</a>             |
| 9  | 2.2e-06            | 0.0024608 | 15.3                                    | 156.1                                   | 0.098                         | <a href="#">1380804_at</a>   | Transcribed locus                                                                       | <a href="#">Info</a> |                                  |
| 10 | 2.9e-06            | 0.0028523 | 4054.2                                  | 758.2                                   | 5.347                         | <a href="#">1373401_at</a>   | Transcribed locus                                                                       | <a href="#">Info</a> |                                  |
| 11 | 3.4e-06            | 0.0028523 | 66.8                                    | 226.5                                   | 0.295                         | <a href="#">1389164_at</a>   | hect domain and RLD 3 (predicted)                                                       | <a href="#">Info</a> | <a href="#">Herc3_predicted</a>  |
| 12 | 3.4e-06            | 0.0028523 | 196                                     | 12.1                                    | 16.198                        | <a href="#">1371209_at</a>   | RT1 class I, CE5                                                                        | <a href="#">Info</a> | <a href="#">RT1-CE5</a>          |
| 13 | 3.9e-06            | 0.0030201 | 238.7                                   | 18.1                                    | 13.188                        | <a href="#">1377899_at</a>   | similar to RIKEN cDNA 2810025M15 (predicted)                                            | <a href="#">Info</a> | <a href="#">RGD1304982_prec</a>  |
| 14 | 5.4e-06            | 0.0037583 | 233.2                                   | 32.1                                    | 7.265                         | <a href="#">1370885_at</a>   | cathepsin Z                                                                             | <a href="#">Info</a> | <a href="#">Ctsz</a>             |
| 15 | 5.6e-06            | 0.0037583 | 113.9                                   | 21.5                                    | 5.298                         | <a href="#">1368097_a_at</a> | reticulon 1                                                                             | <a href="#">Info</a> | <a href="#">Rtn1</a>             |
| 16 | 8e-06              | 0.0046396 | 109.9                                   | 722.1                                   | 0.152                         | <a href="#">1377792_at</a>   | Megf10 protein                                                                          | <a href="#">Info</a> | <a href="#">Megf10</a>           |
| 17 | 9e-06              | 0.0046396 | 142                                     | 54                                      | 2.63                          | <a href="#">1372084_at</a>   | protein tyrosine phosphatase 4a3 (predicted)                                            | <a href="#">Info</a> | <a href="#">Ptp4a3_predicted</a> |
| 18 | 9.2e-06            | 0.0046396 | 1838.4                                  | 286.5                                   | 6.417                         | <a href="#">1369926_at</a>   | glutathione peroxidase 3                                                                | <a href="#">Info</a> | <a href="#">Gpx3</a>             |
| 19 | 9.7e-06            | 0.0046396 | 280.9                                   | 36.1                                    | 7.781                         | <a href="#">1368685_at</a>   | chondroitin sulfate proteoglycan 4                                                      | <a href="#">Info</a> | <a href="#">Cspg4</a>            |
| 20 | 9.9e-06            | 0.0046396 | 1113.9                                  | 3984.3                                  | 0.28                          | <a href="#">1379452_at</a>   | similar to growth arrest-specific protein 2 - mouse                                     | <a href="#">Info</a> | <a href="#">LOC499156</a>        |
| 21 | 1.01e-05           | 0.0046396 | 236.3                                   | 541.9                                   | 0.436                         | <a href="#">1392249_at</a>   | Similar to protein 4.1G                                                                 | <a href="#">Info</a> |                                  |

|    |          |           |        |       |        |                              |                                                                                |                      |                                  |
|----|----------|-----------|--------|-------|--------|------------------------------|--------------------------------------------------------------------------------|----------------------|----------------------------------|
| 22 | 1.04e-05 | 0.0046396 | 61.2   | 16.6  | 3.687  | <a href="#">1383518_at</a>   | Transcribed locus                                                              | <a href="#">Info</a> |                                  |
| 23 | 1.06e-05 | 0.0046396 | 143.2  | 21.7  | 6.599  | <a href="#">1368470_at</a>   | gamma-glutamyl hydrolase                                                       | <a href="#">Info</a> | <a href="#">Ggh</a>              |
| 24 | 1.15e-05 | 0.0047919 | 9.8    | 23    | 0.426  | <a href="#">1397440_at</a>   | Megf10 protein                                                                 | <a href="#">Info</a> | <a href="#">Megf10</a>           |
| 25 | 1.19e-05 | 0.0047919 | 196.8  | 37    | 5.319  | <a href="#">1368593_at</a>   | CD1d1 antigen                                                                  | <a href="#">Info</a> | <a href="#">Cd1d1</a>            |
| 26 | 1.29e-05 | 0.0049948 | 286.2  | 123.6 | 2.316  | <a href="#">1383605_at</a>   | similar to alpha-fetoprotein                                                   | <a href="#">Info</a> | <a href="#">LOC360919</a>        |
| 27 | 1.39e-05 | 0.0051826 | 123.3  | 28.6  | 4.311  | <a href="#">1370414_at</a>   | Rab38, member of RAS oncogene family                                           | <a href="#">Info</a> | <a href="#">Rab38</a>            |
| 28 | 1.5e-05  | 0.0052765 | 36.5   | 12.6  | 2.897  | <a href="#">1372162_at</a>   | acetyl-Coenzyme A synthetase 2 (AMP forming)-like (predicted)                  | <a href="#">Info</a> | <a href="#">Acas2l_predicted</a> |
| 29 | 1.52e-05 | 0.0052765 | 41     | 298.7 | 0.137  | <a href="#">1393645_at</a>   | hypothetical protein LOC317274                                                 | <a href="#">Info</a> | <a href="#">LOC317274</a>        |
| 30 | 1.96e-05 | 0.0065771 | 86.4   | 9.5   | 9.095  | <a href="#">1387968_at</a>   | solute carrier family 6 (neurotransmitter transporter), member 15              | <a href="#">Info</a> | <a href="#">Slc6a15</a>          |
| 31 | 2.28e-05 | 0.0074041 | 52     | 24.4  | 2.131  | <a href="#">1370197_a_at</a> | protein kinase C, zeta                                                         | <a href="#">Info</a> | <a href="#">Prkcz</a>            |
| 32 | 2.46e-05 | 0.0076687 | 136    | 24.8  | 5.484  | <a href="#">1388920_at</a>   | bone morphogenetic protein 6                                                   | <a href="#">Info</a> | <a href="#">Bmp6</a>             |
| 33 | 2.53e-05 | 0.0076687 | 536.5  | 169.6 | 3.163  | <a href="#">1367800_at</a>   | plasminogen activator, tissue                                                  | <a href="#">Info</a> | <a href="#">Plat</a>             |
| 34 | 2.59e-05 | 0.0076687 | 104.9  | 22.9  | 4.581  | <a href="#">1388398_at</a>   |                                                                                | <a href="#">Info</a> |                                  |
| 35 | 3.08e-05 | 0.0084924 | 405.2  | 117.6 | 3.446  | <a href="#">1379292_at</a>   | Similar to 5730420B22Rik protein (predicted)                                   | <a href="#">Info</a> |                                  |
| 36 | 3.1e-05  | 0.0084924 | 4456.1 | 686.1 | 6.495  | <a href="#">1368187_at</a>   | glycoprotein (transmembrane) nmb                                               | <a href="#">Info</a> | <a href="#">Gpnmb</a>            |
| 37 | 3.16e-05 | 0.0084924 | 300.6  | 25.7  | 11.696 | <a href="#">1383610_at</a>   |                                                                                | <a href="#">Info</a> |                                  |
| 38 | 3.24e-05 | 0.0084924 | 55.9   | 114.4 | 0.489  | <a href="#">1382587_at</a>   | Family with sequence similarity 33, member A (predicted)                       | <a href="#">Info</a> | <a href="#">MGC109093</a>        |
| 39 | 3.29e-05 | 0.0084924 | 336    | 103   | 3.262  | <a href="#">1387010_s_at</a> | sodium channel, voltage-gated, type I, beta polypeptide                        | <a href="#">Info</a> | <a href="#">Scn1b</a>            |
| 40 | 3.42e-05 | 0.0085201 | 589.4  | 299.2 | 1.97   | <a href="#">1379389_at</a>   | Neural cell adhesion molecule 1                                                | <a href="#">Info</a> | <a href="#">Ncam1</a>            |
| 41 | 3.47e-05 | 0.0085201 | 28.1   | 7.9   | 3.557  | <a href="#">1384061_at</a>   | Similar to Zinc finger protein ZIC 3 (Zinc finger protein of the cerebellum 3) | <a href="#">Info</a> |                                  |
| 42 | 3.85e-05 | 0.0091722 | 49     | 738.5 | 0.066  | <a href="#">1387137_at</a>   | cartilage oligomeric matrix protein                                            | <a href="#">Info</a> | <a href="#">Comp</a>             |
| 43 | 3.95e-05 | 0.0091722 | 194.8  | 603.5 | 0.323  | <a href="#">1379824_at</a>   | Transcribed locus                                                              | <a href="#">Info</a> |                                  |
| 44 | 4.1e-05  | 0.0091722 | 80.5   | 26.8  | 3.004  | <a href="#">1384771_at</a>   | similar to hypothetical protein                                                | <a href="#">Info</a> | <a href="#">LOC287564</a>        |
| 45 | 4.1e-05  | 0.0091722 | 2985.1 | 58.4  | 51.115 | <a href="#">1373674_at</a>   | microfibrillar associated protein 5 (predicted)                                | <a href="#">Info</a> | <a href="#">Mfap5_predicted</a>  |
| 46 | 4.56e-05 | 0.0099795 | 111.1  | 31.6  | 3.516  | <a href="#">1368008_at</a>   | prominin 1                                                                     | <a href="#">Info</a> | <a href="#">Prom1</a>            |
| 47 | 4.84e-05 | 0.0102348 | 1209.1 | 182.2 | 6.636  | <a href="#">1387659_at</a>   | guanine deaminase                                                              | <a href="#">Info</a> | <a href="#">Gda</a>              |
| 48 | 4.88e-05 | 0.0102348 | 93     | 235.3 | 0.395  | <a href="#">1393467_at</a>   | proprotein convertase subtilisin/kexin type 5                                  | <a href="#">Info</a> | <a href="#">Pcsk5</a>            |
| 49 | 5.04e-05 | 0.0103546 | 192.2  | 27.3  | 7.04   | <a href="#">1373596_at</a>   | similar to hypothetical protein FLJ31737 (predicted)                           | <a href="#">Info</a> | <a href="#">RGD1310423_prec</a>  |
| 50 | 5.62e-05 | 0.0109175 | 636.4  | 61.8  | 10.298 | <a href="#">1388545_at</a>   | Transcribed locus                                                              | <a href="#">Info</a> |                                  |
| 51 | 5.77e-05 | 0.0109175 | 75.4   | 22.6  | 3.336  | <a href="#">1395471_at</a>   | Transcribed locus                                                              | <a href="#">Info</a> |                                  |
| 52 | 5.79e-05 | 0.0109175 | 64     | 19.9  | 3.216  | <a href="#">1367918_at</a>   | fasciculation and elongation protein zeta 1 (zygin I)                          | <a href="#">Info</a> | <a href="#">Fez1</a>             |
| 53 | 5.9e-05  | 0.0109175 | 220.1  | 105.1 | 2.094  | <a href="#">1389782_at</a>   | similar to RIKEN cDNA 2010107G23 (predicted)                                   | <a href="#">Info</a> | <a href="#">RGD1305587_prec</a>  |
| 54 | 6.03e-05 | 0.0109175 | 46.2   | 197.9 | 0.233  | <a href="#">1376972_at</a>   | Solute carrier family 39 (iron-regulated transporter), member 1                | <a href="#">Info</a> | <a href="#">Slc40a1</a>          |
| 55 | 6.21e-05 | 0.0109175 | 505.9  | 70.4  | 7.186  | <a href="#">1388347_at</a>   | similar to lymphocyte antigen 6 complex, locus E                               | <a href="#">Info</a> | <a href="#">LOC362934</a>        |

|    |           |           |       |        |        |                              |                                                                                                                                                                                                       |                      |                                 |
|----|-----------|-----------|-------|--------|--------|------------------------------|-------------------------------------------------------------------------------------------------------------------------------------------------------------------------------------------------------|----------------------|---------------------------------|
| 56 | 6.26e-05  | 0.0109175 | 139.2 | 13.1   | 10.626 | <a href="#">1394946_at</a>   | similar to intracellular protein transport like (XM453) (predicted)                                                                                                                                   | <a href="#">Info</a> | <a href="#">RGD1307525_prec</a> |
| 57 | 6.29e-05  | 0.0109175 | 110.3 | 16     | 6.894  | <a href="#">1388395_at</a>   | G0/G1 switch gene 2 (predicted)                                                                                                                                                                       | <a href="#">Info</a> | <a href="#">G0s2_predicted</a>  |
| 58 | 6.29e-05  | 0.0109175 | 98.7  | 14     | 7.05   | <a href="#">1376868_at</a>   |                                                                                                                                                                                                       | <a href="#">Info</a> |                                 |
| 59 | 6.45e-05  | 0.0110054 | 17.7  | 64.7   | 0.274  | <a href="#">1380763_at</a>   |                                                                                                                                                                                                       | <a href="#">Info</a> |                                 |
| 60 | 6.95e-05  | 0.0116609 | 73.9  | 32.5   | 2.274  | <a href="#">1397615_at</a>   | Transcribed locus                                                                                                                                                                                     | <a href="#">Info</a> |                                 |
| 61 | 7.12e-05  | 0.0117503 | 181   | 47.2   | 3.835  | <a href="#">1372584_at</a>   | similar to DKFZP566K1924 protein (predicted)                                                                                                                                                          | <a href="#">Info</a> | <a href="#">RGD1308373_prec</a> |
| 62 | 7.27e-05  | 0.0118044 | 88.1  | 16.8   | 5.244  | <a href="#">1377390_at</a>   | beta-site APP-cleaving enzyme 2                                                                                                                                                                       | <a href="#">Info</a> | <a href="#">RGD:1303241</a>     |
| 63 | 7.6e-05   | 0.0118516 | 63.2  | 24.6   | 2.569  | <a href="#">1373912_at</a>   | Transcribed locus, weakly similar to XP_488820.1 PREDICTED: hypothetical protein XP_488820 [Mus musculus]                                                                                             | <a href="#">Info</a> |                                 |
| 64 | 7.69e-05  | 0.0118516 | 407.8 | 188.9  | 2.159  | <a href="#">1368320_at</a>   | neural cell adhesion molecule 1                                                                                                                                                                       | <a href="#">Info</a> | <a href="#">Ncam1</a>           |
| 65 | 7.7e-05   | 0.0118516 | 143.8 | 793.8  | 0.181  | <a href="#">1390412_at</a>   | Solute carrier family 39 (iron-regulated transporter), member 1                                                                                                                                       | <a href="#">Info</a> | <a href="#">Slc40a1</a>         |
| 66 | 7.77e-05  | 0.0118516 | 533.8 | 292    | 1.828  | <a href="#">1385573_at</a>   | Homer homolog 3 (Drosophila)                                                                                                                                                                          | <a href="#">Info</a> | <a href="#">Homer3</a>          |
| 67 | 8.12e-05  | 0.0122006 | 162.9 | 55.5   | 2.935  | <a href="#">1387984_at</a>   | chemokine-like factor 1                                                                                                                                                                               | <a href="#">Info</a> | <a href="#">Cklf1</a>           |
| 68 | 8.28e-05  | 0.0122581 | 137.1 | 359.6  | 0.381  | <a href="#">1391173_at</a>   | Transcribed locus                                                                                                                                                                                     | <a href="#">Info</a> |                                 |
| 69 | 8.43e-05  | 0.0122992 | 538.8 | 223.7  | 2.409  | <a href="#">1368104_at</a>   | tetraspan 2                                                                                                                                                                                           | <a href="#">Info</a> | <a href="#">Tspan2</a>          |
| 70 | 8.57e-05  | 0.0123249 | 106.2 | 20.7   | 5.13   | <a href="#">1384406_at</a>   | Similar to 5730439E10Rik protein (predicted)                                                                                                                                                          | <a href="#">Info</a> |                                 |
| 71 | 9.1e-05   | 0.012671  | 978.2 | 27.9   | 35.061 | <a href="#">1384063_at</a>   | collagen triple helix repeat containing 1                                                                                                                                                             | <a href="#">Info</a> | <a href="#">Cthrc1</a>          |
| 72 | 9.25e-05  | 0.012671  | 54.2  | 23.7   | 2.287  | <a href="#">1393109_at</a>   | CDNA clone IMAGE:7302574                                                                                                                                                                              | <a href="#">Info</a> |                                 |
| 73 | 9.3e-05   | 0.012671  | 76.7  | 13.4   | 5.724  | <a href="#">1370464_at</a>   | ATP-binding cassette, sub-family B (MDR/TAP), member 1A                                                                                                                                               | <a href="#">Info</a> | <a href="#">Abcb1a</a>          |
| 74 | 9.39e-05  | 0.012671  | 22.4  | 39.4   | 0.569  | <a href="#">1393523_at</a>   | Coilin                                                                                                                                                                                                | <a href="#">Info</a> | <a href="#">Coil</a>            |
| 75 | 9.44e-05  | 0.012671  | 65    | 35.5   | 1.831  | <a href="#">1370388_at</a>   | solute carrier family 9 (sodium/hydrogen exchanger), isoform 5                                                                                                                                        | <a href="#">Info</a> | <a href="#">Slc9a5</a>          |
| 76 | 9.81e-05  | 0.0129944 | 500.4 | 195.1  | 2.565  | <a href="#">1368105_at</a>   | tetraspan 2                                                                                                                                                                                           | <a href="#">Info</a> | <a href="#">Tspan2</a>          |
| 77 | 0.0001022 | 0.0133617 | 748.8 | 1854.4 | 0.404  | <a href="#">1374060_at</a>   | Transcribed locus                                                                                                                                                                                     | <a href="#">Info</a> |                                 |
| 78 | 0.000106  | 0.0135586 | 483.9 | 182.4  | 2.653  | <a href="#">1387004_at</a>   | neuroblastoma, suppression of tumorigenicity 1                                                                                                                                                        | <a href="#">Info</a> | <a href="#">Nbl1</a>            |
| 79 | 0.0001064 | 0.0135586 | 306   | 184.9  | 1.655  | <a href="#">1377768_at</a>   | vitamin A-deficient testicular protein 5                                                                                                                                                              | <a href="#">Info</a> | <a href="#">Vad5</a>            |
| 80 | 0.0001116 | 0.013938  | 179.9 | 660.4  | 0.272  | <a href="#">1372226_at</a>   | Transcribed locus, strongly similar to NP_055665.1 SLIT-ROBO Rho GTPase-activating protein 2; SLIT-ROBO Rho GTPase-activating protein 3; WAVE-associated Rac GTPase activating protein [Homo sapiens] | <a href="#">Info</a> |                                 |
| 81 | 0.0001126 | 0.013938  | 36.2  | 18.4   | 1.967  | <a href="#">1377453_at</a>   | similar to hypothetical protein FLJ23554 (predicted)                                                                                                                                                  | <a href="#">Info</a> | <a href="#">RGD1309108_prec</a> |
| 82 | 0.0001138 | 0.013938  | 32.5  | 84.5   | 0.385  | <a href="#">1396939_at</a>   | Transcribed locus                                                                                                                                                                                     | <a href="#">Info</a> |                                 |
| 83 | 0.000116  | 0.013938  | 71.6  | 36.5   | 1.962  | <a href="#">1385670_at</a>   | serine dehydratase-like (predicted)                                                                                                                                                                   | <a href="#">Info</a> | <a href="#">Sdsl_predicted</a>  |
| 84 | 0.0001163 | 0.013938  | 131.6 | 40.5   | 3.249  | <a href="#">1367835_at</a>   | proprotein convertase subtilisin/kexin type 1 inhibitor                                                                                                                                               | <a href="#">Info</a> | <a href="#">Pcsk1n</a>          |
| 85 | 0.0001187 | 0.0140583 | 24.6  | 83.6   | 0.294  | <a href="#">1368411_a_at</a> | microtubule-associated protein 2                                                                                                                                                                      | <a href="#">Info</a> | <a href="#">Mtap2</a>           |

|     |           |           |        |        |        |                              |                                                                                                             |                      |                                   |
|-----|-----------|-----------|--------|--------|--------|------------------------------|-------------------------------------------------------------------------------------------------------------|----------------------|-----------------------------------|
| 86  | 0.0001201 | 0.0140587 | 178.9  | 419.2  | 0.427  | <a href="#">1368002_at</a>   | mutS homolog 2 (E. coli)                                                                                    | <a href="#">Info</a> | <a href="#">Msh2</a>              |
| 87  | 0.0001232 | 0.0141504 | 235.7  | 136.3  | 1.729  | <a href="#">1372955_at</a>   | Similar to KIAA0965 protein                                                                                 | <a href="#">Info</a> |                                   |
| 88  | 0.0001248 | 0.0141504 | 268.8  | 23.3   | 11.536 | <a href="#">1392852_at</a>   |                                                                                                             | <a href="#">Info</a> |                                   |
| 89  | 0.0001251 | 0.0141504 | 244.8  | 25.6   | 9.562  | <a href="#">1374778_at</a>   | cathepsin C                                                                                                 | <a href="#">Info</a> | <a href="#">Ctsc</a>              |
| 90  | 0.0001268 | 0.0141587 | 82.6   | 25.7   | 3.214  | <a href="#">1376350_at</a>   | Transcribed locus                                                                                           | <a href="#">Info</a> |                                   |
| 91  | 0.0001297 | 0.0141587 | 51.9   | 95.8   | 0.542  | <a href="#">1392554_a_at</a> |                                                                                                             | <a href="#">Info</a> |                                   |
| 92  | 0.0001298 | 0.0141587 | 607.2  | 1240.4 | 0.49   | <a href="#">1376587_at</a>   | F-box only protein 11                                                                                       | <a href="#">Info</a> | <a href="#">RGD:727935</a>        |
| 93  | 0.0001308 | 0.0141587 | 39.2   | 17     | 2.306  | <a href="#">1376060_at</a>   | Protein phosphatase 1H (PP2C domain containing) (predicted)                                                 | <a href="#">Info</a> |                                   |
| 94  | 0.000136  | 0.0144739 | 160.8  | 346.1  | 0.465  | <a href="#">1392773_at</a>   | proprotein convertase subtilisin/kexin type 5                                                               | <a href="#">Info</a> | <a href="#">Pcsk5</a>             |
| 95  | 0.0001377 | 0.0144739 | 951.4  | 113.9  | 8.353  | <a href="#">1372011_at</a>   | Guanine deaminase                                                                                           | <a href="#">Info</a> | <a href="#">Gda</a>               |
| 96  | 0.0001385 | 0.0144739 | 130.8  | 75.1   | 1.742  | <a href="#">1372691_at</a>   | uridine phosphorylase 1 (predicted)                                                                         | <a href="#">Info</a> | <a href="#">Upp1_predicted</a>    |
| 97  | 0.0001405 | 0.0144739 | 323.9  | 789.7  | 0.41   | <a href="#">1383112_at</a>   | Transcribed locus                                                                                           | <a href="#">Info</a> |                                   |
| 98  | 0.0001409 | 0.0144739 | 307    | 176.8  | 1.736  | <a href="#">1373310_at</a>   | Transcribed locus                                                                                           | <a href="#">Info</a> |                                   |
| 99  | 0.0001434 | 0.0145061 | 1477.9 | 83.3   | 17.742 | <a href="#">1372256_at</a>   |                                                                                                             | <a href="#">Info</a> |                                   |
| 100 | 0.0001461 | 0.0145061 | 656.1  | 1062   | 0.618  | <a href="#">1388488_at</a>   | LSM3 homolog, U6 small nuclear RNA associated (S. cerevisiae) (predicted)                                   | <a href="#">Info</a> | <a href="#">Lsm3_predicted</a>    |
| 101 | 0.0001472 | 0.0145061 | 48.5   | 14     | 3.464  | <a href="#">1390873_at</a>   | Transcribed locus, strongly similar to XP_125798.5 PREDICTED: BTB (POZ) domain containing 11 [Mus musculus] | <a href="#">Info</a> |                                   |
| 102 | 0.0001475 | 0.0145061 | 2079.7 | 42.8   | 48.591 | <a href="#">1370154_at</a>   | lysozyme                                                                                                    | <a href="#">Info</a> | <a href="#">Lyz</a>               |
| 103 | 0.0001506 | 0.0145061 | 45.4   | 11.1   | 4.09   | <a href="#">1383783_at</a>   | protocadherin 9 (predicted)                                                                                 | <a href="#">Info</a> | <a href="#">Pcdh9_predicted</a>   |
| 104 | 0.0001507 | 0.0145061 | 1246.7 | 677    | 1.842  | <a href="#">1370245_at</a>   | cathepsin L                                                                                                 | <a href="#">Info</a> | <a href="#">Ctsl</a>              |
| 105 | 0.0001513 | 0.0145061 | 95.5   | 21.8   | 4.381  | <a href="#">1384655_at</a>   | kin of IRRE like 3 (Drosophila) (predicted)                                                                 | <a href="#">Info</a> | <a href="#">Kirrel3_predicted</a> |
| 106 | 0.0001556 | 0.0145264 | 104.9  | 21.5   | 4.879  | <a href="#">1368975_at</a>   | CD38 antigen                                                                                                | <a href="#">Info</a> | <a href="#">Cd38</a>              |
| 107 | 0.0001572 | 0.0145264 | 161    | 70.7   | 2.277  | <a href="#">1397317_at</a>   | Transcribed locus                                                                                           | <a href="#">Info</a> |                                   |
| 108 | 0.0001612 | 0.0145264 | 107.8  | 53.5   | 2.015  | <a href="#">1377761_at</a>   | glutamine-fructose-6-phosphate transaminase 2                                                               | <a href="#">Info</a> | <a href="#">RGD:1303097</a>       |
| 109 | 0.0001612 | 0.0145264 | 31.1   | 116.4  | 0.267  | <a href="#">1369128_at</a>   | glutamate receptor, ionotropic, kainate 5                                                                   | <a href="#">Info</a> | <a href="#">Grik5</a>             |
| 110 | 0.0001655 | 0.0145264 | 296.4  | 44     | 6.736  | <a href="#">1397655_at</a>   |                                                                                                             | <a href="#">Info</a> |                                   |
| 111 | 0.0001657 | 0.0145264 | 54.6   | 8.6    | 6.349  | <a href="#">1384302_at</a>   | solute carrier family 6 (neurotransmitter transporter), member 17                                           | <a href="#">Info</a> | <a href="#">Slc6a17</a>           |
| 112 | 0.000166  | 0.0145264 | 124.3  | 32.3   | 3.848  | <a href="#">1376709_at</a>   | solute carrier family 39 (metal ion transporter), member 8 (predicted)                                      | <a href="#">Info</a> | <a href="#">Slc39a8_predicted</a> |
| 113 | 0.0001675 | 0.0145264 | 535.7  | 299.3  | 1.79   | <a href="#">1380665_at</a>   | CGI-58-like protein                                                                                         | <a href="#">Info</a> | <a href="#">LOC316122</a>         |
| 114 | 0.0001686 | 0.0145264 | 252    | 788.9  | 0.319  | <a href="#">1373897_at</a>   |                                                                                                             | <a href="#">Info</a> |                                   |
| 115 | 0.0001692 | 0.0145264 | 1992.2 | 865.2  | 2.303  | <a href="#">1383284_at</a>   | Transcribed locus                                                                                           | <a href="#">Info</a> |                                   |
| 116 | 0.0001709 | 0.0145264 | 290.3  | 162.7  | 1.784  | <a href="#">1376804_at</a>   | similar to Myosin VI                                                                                        | <a href="#">Info</a> | <a href="#">LOC315840</a>         |
| 117 | 0.0001711 | 0.0145264 | 106.4  | 201.6  | 0.528  | <a href="#">1368453_at</a>   | fatty acid desaturase 2                                                                                     | <a href="#">Info</a> | <a href="#">Fads2</a>             |
| 118 | 0.0001719 | 0.0145264 | 32.6   | 10.8   | 3.019  | <a href="#">1393075_at</a>   | Transcribed locus                                                                                           | <a href="#">Info</a> |                                   |
| 119 | 0.0001734 | 0.0145264 | 1746.9 | 867.6  | 2.013  | <a href="#">1383404_at</a>   | Transcribed locus                                                                                           | <a href="#">Info</a> |                                   |
| 120 | 0.0001742 | 0.0145264 | 334.6  | 165.6  | 2.021  | <a href="#">1373998_at</a>   | Transcribed locus                                                                                           | <a href="#">Info</a> |                                   |
| 121 | 0.0001746 | 0.0145264 | 14.6   | 76.6   | 0.191  | <a href="#">1385202_at</a>   | Transcribed locus                                                                                           | <a href="#">Info</a> |                                   |

|     |           |           |        |        |       |                            |                                                                       |                      |                                   |
|-----|-----------|-----------|--------|--------|-------|----------------------------|-----------------------------------------------------------------------|----------------------|-----------------------------------|
| 122 | 0.0001796 | 0.0146995 | 172.6  | 64.8   | 2.664 | <a href="#">1368372_at</a> | steroid sulfatase                                                     | <a href="#">Info</a> | <a href="#">Sts</a>               |
| 123 | 0.0001796 | 0.0146995 | 75     | 124.4  | 0.603 | <a href="#">1375054_at</a> | Transcribed locus                                                     | <a href="#">Info</a> |                                   |
| 124 | 0.0001877 | 0.0152385 | 187.1  | 54.6   | 3.427 | <a href="#">1373431_at</a> | leucine-rich repeat-containing 5 (predicted)                          | <a href="#">Info</a> | <a href="#">Lrrc5_predicted</a>   |
| 125 | 0.0001899 | 0.0152938 | 197.3  | 362    | 0.545 | <a href="#">1382053_at</a> | similar to MEGF12 (predicted)                                         | <a href="#">Info</a> | <a href="#">RGD1305653_prec</a>   |
| 126 | 0.0001941 | 0.015508  | 73.2   | 16.4   | 4.463 | <a href="#">1393659_at</a> | translocation associated membrane protein 1-like 1 (predicted)        | <a href="#">Info</a> | <a href="#">Tram111_predicted</a> |
| 127 | 0.0001959 | 0.0155285 | 85.7   | 165.6  | 0.518 | <a href="#">1392467_at</a> | inositol (myo)-1(or 4)-monophosphatase 2                              | <a href="#">Info</a> | <a href="#">Impa2</a>             |
| 128 | 0.0002038 | 0.0159511 | 365    | 885.9  | 0.412 | <a href="#">1385227_at</a> | trichorhinophalangeal syndrome I (predicted)                          | <a href="#">Info</a> | <a href="#">Trps1_predicted</a>   |
| 129 | 0.0002044 | 0.0159511 | 266.6  | 155.2  | 1.718 | <a href="#">1381063_at</a> | adenylate cyclase 9 (predicted)                                       | <a href="#">Info</a> | <a href="#">Adcy9_predicted</a>   |
| 130 | 0.0002198 | 0.0168134 | 241.1  | 55.1   | 4.376 | <a href="#">1371840_at</a> | endothelial differentiation sphingolipid G-protein-coupled receptor 1 | <a href="#">Info</a> | <a href="#">Edg1</a>              |
| 131 | 0.0002205 | 0.0168134 | 267.9  | 425.6  | 0.629 | <a href="#">1393009_at</a> | similar to RIKEN cDNA 2410002F23 (predicted)                          | <a href="#">Info</a> | <a href="#">RGD1309326_prec</a>   |
| 132 | 0.0002214 | 0.0168134 | 48.5   | 13.7   | 3.54  | <a href="#">1370465_at</a> | ATP-binding cassette, sub-family B (MDR/TAP), member 1A               | <a href="#">Info</a> | <a href="#">Abcb1a</a>            |
| 133 | 0.0002226 | 0.0168134 | 1092.3 | 250.8  | 4.355 | <a href="#">1390107_at</a> | synaptotagmin-like 2 (predicted)                                      | <a href="#">Info</a> | <a href="#">Syt12_predicted</a>   |
| 134 | 0.0002238 | 0.0168134 | 102.4  | 39.9   | 2.566 | <a href="#">1388201_at</a> | bone morphogenetic protein 6                                          | <a href="#">Info</a> | <a href="#">Bmp6</a>              |
| 135 | 0.0002264 | 0.0168827 | 4743.7 | 2830.1 | 1.676 | <a href="#">1370328_at</a> | Dickkopf homolog 3 (Xenopus laevis)                                   | <a href="#">Info</a> | <a href="#">Dkk3</a>              |
| 136 | 0.0002283 | 0.0168992 | 78.7   | 16.9   | 4.657 | <a href="#">1383606_at</a> | membrane targeting (tandem) C2 domain containing 1                    | <a href="#">Info</a> | <a href="#">Mtac2d1</a>           |
| 137 | 0.000236  | 0.0173417 | 40.5   | 19.8   | 2.045 | <a href="#">1385653_at</a> |                                                                       | <a href="#">Info</a> |                                   |
| 138 | 0.0002412 | 0.0174566 | 44.4   | 165.8  | 0.268 | <a href="#">1395109_at</a> | Transcribed locus                                                     | <a href="#">Info</a> |                                   |
| 139 | 0.0002425 | 0.0174566 | 23.1   | 10.9   | 2.119 | <a href="#">1381269_at</a> | Transcribed locus                                                     | <a href="#">Info</a> |                                   |
| 140 | 0.0002432 | 0.0174566 | 2197.7 | 4126.8 | 0.533 | <a href="#">1368883_at</a> | nephroblastoma overexpressed gene                                     | <a href="#">Info</a> | <a href="#">Nov</a>               |
| 141 | 0.0002445 | 0.0174566 | 391.2  | 886.8  | 0.441 | <a href="#">1388167_at</a> | nuclear factor I/B                                                    | <a href="#">Info</a> | <a href="#">Nfib</a>              |
| 142 | 0.0002491 | 0.0176137 | 58.9   | 99.5   | 0.592 | <a href="#">1391536_at</a> | similar to cDNA sequence BC020002 (predicted)                         | <a href="#">Info</a> | <a href="#">RGD1308432_prec</a>   |
| 143 | 0.0002502 | 0.0176137 | 78.3   | 201.5  | 0.389 | <a href="#">1394031_at</a> | similar to Protein C20orf129 homolog                                  | <a href="#">Info</a> | <a href="#">LOC311598</a>         |
| 144 | 0.0002583 | 0.0179551 | 190.2  | 405.8  | 0.469 | <a href="#">1377299_at</a> | nuclear autoantigenic sperm protein                                   | <a href="#">Info</a> | <a href="#">RGD:1359609</a>       |
| 145 | 0.0002603 | 0.0179551 | 91.7   | 37.4   | 2.452 | <a href="#">1373759_at</a> | Transcribed locus                                                     | <a href="#">Info</a> |                                   |
| 146 | 0.0002604 | 0.0179551 | 236.5  | 538.5  | 0.439 | <a href="#">1393629_at</a> | H2.0-like homeo box 1 (Drosophila) (predicted)                        | <a href="#">Info</a> | <a href="#">Hlx1_predicted</a>    |
| 147 | 0.0002638 | 0.0180146 | 56.6   | 115.2  | 0.491 | <a href="#">1391477_at</a> | Transcribed locus                                                     | <a href="#">Info</a> |                                   |
| 148 | 0.0002682 | 0.0180146 | 157.5  | 351.2  | 0.448 | <a href="#">1378038_at</a> | Polypyrimidine tract binding protein 2                                | <a href="#">Info</a> | <a href="#">Ptbp2</a>             |
| 149 | 0.0002683 | 0.0180146 | 124.7  | 35.9   | 3.474 | <a href="#">1370106_at</a> | fibroblast growth factor 18                                           | <a href="#">Info</a> | <a href="#">Fgf18</a>             |
| 150 | 0.0002707 | 0.0180146 | 1052.5 | 211    | 4.988 | <a href="#">1378927_at</a> |                                                                       | <a href="#">Info</a> |                                   |
| 151 | 0.0002718 | 0.0180146 | 78.8   | 139.4  | 0.565 | <a href="#">1375897_at</a> | Transcribed locus                                                     | <a href="#">Info</a> |                                   |
| 152 | 0.000272  | 0.0180146 | 76.8   | 132.4  | 0.58  | <a href="#">1380118_at</a> | similar to hypothetical gene supported by AK085276                    | <a href="#">Info</a> | <a href="#">LOC315646</a>         |
| 153 | 0.000275  | 0.0180943 | 18.8   | 8.9    | 2.112 | <a href="#">1391011_at</a> | Transcribed locus                                                     | <a href="#">Info</a> |                                   |
| 154 | 0.0002832 | 0.0185128 | 86.7   | 182    | 0.476 | <a href="#">1385068_at</a> | Transcribed locus                                                     | <a href="#">Info</a> |                                   |
| 155 | 0.0002881 | 0.018561  | 372.7  | 924.4  | 0.403 | <a href="#">1384948_at</a> | Transcribed locus                                                     | <a href="#">Info</a> |                                   |

|     |           |           |        |        |        |                              |                                                                                                                    |                      |                                   |
|-----|-----------|-----------|--------|--------|--------|------------------------------|--------------------------------------------------------------------------------------------------------------------|----------------------|-----------------------------------|
| 156 | 0.0002912 | 0.018561  | 91.7   | 26.7   | 3.434  | <a href="#">1398661_at</a>   |                                                                                                                    | <a href="#">Info</a> |                                   |
| 157 | 0.0002929 | 0.018561  | 331.3  | 812.7  | 0.408  | <a href="#">1373644_at</a>   | CDNA clone IMAGE:7308494                                                                                           | <a href="#">Info</a> |                                   |
| 158 | 0.0002933 | 0.018561  | 170.9  | 51.2   | 3.338  | <a href="#">1367682_at</a>   | midkine                                                                                                            | <a href="#">Info</a> | <a href="#">Mdk</a>               |
| 159 | 0.000295  | 0.018561  | 1255.3 | 8609.9 | 0.146  | <a href="#">1367700_at</a>   | fibromodulin                                                                                                       | <a href="#">Info</a> | <a href="#">Fmod</a>              |
| 160 | 0.000295  | 0.018561  | 575.1  | 339.7  | 1.693  | <a href="#">1384286_at</a>   | Transcribed locus                                                                                                  | <a href="#">Info</a> |                                   |
| 161 | 0.0003002 | 0.0187444 | 41.1   | 72.8   | 0.565  | <a href="#">1384042_at</a>   | Transcribed locus                                                                                                  | <a href="#">Info</a> |                                   |
| 162 | 0.000302  | 0.0187444 | 1419.2 | 3133.6 | 0.453  | <a href="#">1371131_a_at</a> | upregulated by 1,25-dihydroxyvitamin D-3                                                                           | <a href="#">Info</a> | <a href="#">Txnip</a>             |
| 163 | 0.0003035 | 0.0187444 | 369.5  | 715.3  | 0.517  | <a href="#">1369971_a_at</a> | heterogeneous nuclear ribonucleoprotein D                                                                          | <a href="#">Info</a> | <a href="#">Hnrpd</a>             |
| 164 | 0.0003071 | 0.0188511 | 103    | 22.2   | 4.64   | <a href="#">1383304_at</a>   | Transcribed locus                                                                                                  | <a href="#">Info</a> |                                   |
| 165 | 0.0003199 | 0.0194729 | 303.1  | 140.4  | 2.159  | <a href="#">1378477_a_at</a> | similar to Formin homology 2 domain containing 1                                                                   | <a href="#">Info</a> | <a href="#">LOC291964</a>         |
| 166 | 0.0003224 | 0.0194729 | 99.3   | 176.9  | 0.561  | <a href="#">1384925_at</a>   | Similar to IL-17D                                                                                                  | <a href="#">Info</a> |                                   |
| 167 | 0.0003292 | 0.0194729 | 103.4  | 11.5   | 8.991  | <a href="#">1372455_at</a>   | transmembrane 4 superfamily member 12 (predicted)                                                                  | <a href="#">Info</a> | <a href="#">Tm4sf12_predicted</a> |
| 168 | 0.000338  | 0.0194729 | 964.6  | 286    | 3.373  | <a href="#">1391435_at</a>   | phospholipid transfer protein (predicted)                                                                          | <a href="#">Info</a> | <a href="#">Pltp_predicted</a>    |
| 169 | 0.0003436 | 0.0194729 | 93.1   | 23.9   | 3.895  | <a href="#">1398511_at</a>   | sushi domain containing 2 (predicted)                                                                              | <a href="#">Info</a> | <a href="#">Susd2_predicted</a>   |
| 170 | 0.0003438 | 0.0194729 | 670.8  | 1026.9 | 0.653  | <a href="#">1383162_at</a>   |                                                                                                                    | <a href="#">Info</a> |                                   |
| 171 | 0.000344  | 0.0194729 | 503.6  | 799    | 0.63   | <a href="#">1373387_at</a>   |                                                                                                                    | <a href="#">Info</a> |                                   |
| 172 | 0.0003449 | 0.0194729 | 1531.8 | 937.9  | 1.633  | <a href="#">1372610_at</a>   | procollagen-proline, 2-oxoglutarate 4-dioxygenase (proline 4-hydroxylase), alpha II polypeptide (predicted)        | <a href="#">Info</a> | <a href="#">P4ha2_predicted</a>   |
| 173 | 0.0003457 | 0.0194729 | 40.3   | 170.4  | 0.237  | <a href="#">1374794_at</a>   | kinesin-like 7                                                                                                     | <a href="#">Info</a> | <a href="#">Kns17</a>             |
| 174 | 0.0003475 | 0.0194729 | 73.2   | 155.9  | 0.47   | <a href="#">1397297_at</a>   | Transcribed locus                                                                                                  | <a href="#">Info</a> |                                   |
| 175 | 0.0003491 | 0.0194729 | 66.6   | 16.5   | 4.036  | <a href="#">1396405_at</a>   | Transcribed locus, moderately similar to XP_580018.1 PREDICTED: hypothetical protein XP_580018 [Rattus norvegicus] | <a href="#">Info</a> |                                   |
| 176 | 0.0003513 | 0.0194729 | 37.6   | 117.5  | 0.32   | <a href="#">1393615_at</a>   | Transcribed locus                                                                                                  | <a href="#">Info</a> |                                   |
| 177 | 0.0003528 | 0.0194729 | 68.3   | 148.4  | 0.46   | <a href="#">1377967_at</a>   | Retroviral integration site 2 (predicted)                                                                          | <a href="#">Info</a> |                                   |
| 178 | 0.0003528 | 0.0194729 | 65.2   | 172.2  | 0.379  | <a href="#">1381472_at</a>   | Similar to Mitochondrial folate transporter/carrier                                                                | <a href="#">Info</a> |                                   |
| 179 | 0.0003555 | 0.0194729 | 284.5  | 19.9   | 14.296 | <a href="#">1379416_at</a>   | Autism susceptibility candidate 2 (predicted)                                                                      | <a href="#">Info</a> |                                   |
| 180 | 0.0003563 | 0.0194729 | 51     | 177.5  | 0.287  | <a href="#">1380775_at</a>   | M-phase phosphoprotein 1 (predicted)                                                                               | <a href="#">Info</a> | <a href="#">Mphosph1_predict</a>  |
| 181 | 0.0003579 | 0.0194729 | 304.3  | 182    | 1.672  | <a href="#">1370848_at</a>   | solute carrier family 2 (facilitated glucose transporter), member 1                                                | <a href="#">Info</a> | <a href="#">Slc2a1</a>            |
| 182 | 0.0003603 | 0.0194729 | 76     | 139.1  | 0.546  | <a href="#">1390181_at</a>   |                                                                                                                    | <a href="#">Info</a> |                                   |
| 183 | 0.0003604 | 0.0194729 | 350.5  | 181.5  | 1.931  | <a href="#">1368254_a_at</a> | sphingosine kinase 1                                                                                               | <a href="#">Info</a> | <a href="#">Sphk1</a>             |
| 184 | 0.0003613 | 0.0194729 | 193.5  | 38.7   | 5      | <a href="#">1389186_at</a>   | Transcribed locus                                                                                                  | <a href="#">Info</a> |                                   |
| 185 | 0.0003644 | 0.0194729 | 27.4   | 56.2   | 0.488  | <a href="#">1369771_at</a>   | insulin receptor substrate 1                                                                                       | <a href="#">Info</a> | <a href="#">Irs1</a>              |
| 186 | 0.0003644 | 0.0194729 | 113.4  | 16.4   | 6.915  | <a href="#">1393433_at</a>   | similar to Agrin (predicted)                                                                                       | <a href="#">Info</a> | <a href="#">RGD1306592_prec</a>   |
| 187 | 0.0003644 | 0.0194729 | 1924.6 | 656    | 2.934  | <a href="#">1369947_at</a>   | cathepsin K                                                                                                        | <a href="#">Info</a> | <a href="#">Ctsk</a>              |
| 188 | 0.0003658 | 0.0194729 | 104.2  | 51.4   | 2.027  | <a href="#">1372515_at</a>   | Transcribed locus                                                                                                  | <a href="#">Info</a> |                                   |

|     |           |           |        |        |        |                              |                                                                         |                      |                                  |
|-----|-----------|-----------|--------|--------|--------|------------------------------|-------------------------------------------------------------------------|----------------------|----------------------------------|
| 189 | 0.0003676 | 0.0194729 | 645.1  | 300.3  | 2.148  | <a href="#">1368379_at</a>   | CD36 antigen (collagen type I receptor, thrombospondin receptor)-like 2 | <a href="#">Info</a> | <a href="#">Scarb2</a>           |
| 190 | 0.0003712 | 0.0194729 | 154.8  | 29.3   | 5.283  | <a href="#">1373545_at</a>   | Transcribed locus                                                       | <a href="#">Info</a> |                                  |
| 191 | 0.0003744 | 0.0194729 | 147.6  | 31.7   | 4.656  | <a href="#">1386666_at</a>   | eyes absent 2 homolog (Drosophila)                                      | <a href="#">Info</a> | <a href="#">Eya2</a>             |
| 192 | 0.0003747 | 0.0194729 | 126.3  | 79.8   | 1.583  | <a href="#">1380404_at</a>   |                                                                         | <a href="#">Info</a> |                                  |
| 193 | 0.0003752 | 0.0194729 | 441.8  | 28.4   | 15.556 | <a href="#">1397808_at</a>   | Cathepsin C                                                             | <a href="#">Info</a> | <a href="#">Ctsc</a>             |
| 194 | 0.0003802 | 0.0194729 | 254.3  | 83.8   | 3.035  | <a href="#">1367905_at</a>   | ectonucleotide pyrophosphatase/phosphodiesterase 3                      | <a href="#">Info</a> | <a href="#">Enpp3</a>            |
| 195 | 0.0003815 | 0.0194729 | 153.2  | 404.2  | 0.379  | <a href="#">1367780_at</a>   | pituitary tumor-transforming 1                                          | <a href="#">Info</a> | <a href="#">Pttg1</a>            |
| 196 | 0.0003821 | 0.0194729 | 125    | 201.1  | 0.622  | <a href="#">1373338_at</a>   | Transcribed locus                                                       | <a href="#">Info</a> |                                  |
| 197 | 0.0003852 | 0.0194729 | 552.6  | 259.6  | 2.129  | <a href="#">1390385_at</a>   | Similar to D-glucuronyl C5-epimerase                                    | <a href="#">Info</a> |                                  |
| 198 | 0.0003862 | 0.0194729 | 80     | 214.6  | 0.373  | <a href="#">1379801_at</a>   | LOC499790                                                               | <a href="#">Info</a> |                                  |
| 199 | 0.0003871 | 0.0194729 | 39.9   | 9.1    | 4.385  | <a href="#">1378665_at</a>   | Protocadherin 9 (predicted)                                             | <a href="#">Info</a> |                                  |
| 200 | 0.0003877 | 0.0194729 | 180.9  | 38.6   | 4.687  | <a href="#">1373617_at</a>   | epithelial membrane protein 2                                           | <a href="#">Info</a> | <a href="#">RGD:1359629</a>      |
| 201 | 0.0003888 | 0.0194729 | 150.1  | 42.6   | 3.523  | <a href="#">1374544_at</a>   | CDNA clone MGC:112715 IMAGE:7377326                                     | <a href="#">Info</a> |                                  |
| 202 | 0.0003917 | 0.019509  | 28.9   | 49.4   | 0.585  | <a href="#">1393655_at</a>   | RAD54 like (S. cerevisiae) (predicted)                                  | <a href="#">Info</a> | <a href="#">Rad54l_predicted</a> |
| 203 | 0.000398  | 0.019509  | 118.2  | 261.2  | 0.453  | <a href="#">1384591_at</a>   | Similar to hypothetical protein FLJ32884 (predicted)                    | <a href="#">Info</a> |                                  |
| 204 | 0.0003999 | 0.019509  | 171    | 57.2   | 2.99   | <a href="#">1371702_at</a>   | transmembrane 4 superfamily member 2                                    | <a href="#">Info</a> | <a href="#">Tm4sf2</a>           |
| 205 | 0.0004004 | 0.019509  | 46.5   | 16.1   | 2.888  | <a href="#">1371210_s_at</a> | RT1 class Ib, locus Aw2 /// RT1 class I, CE5                            | <a href="#">Info</a> | <a href="#">RT1-Aw2 /// RT1-</a> |
| 206 | 0.0004021 | 0.019509  | 24.8   | 65.8   | 0.377  | <a href="#">1369218_at</a>   | met proto-oncogene                                                      | <a href="#">Info</a> | <a href="#">Met</a>              |
| 207 | 0.0004035 | 0.019509  | 239.2  | 1468.5 | 0.163  | <a href="#">1368422_at</a>   | mesenchyme homeo box 2                                                  | <a href="#">Info</a> | <a href="#">Meox2</a>            |
| 208 | 0.0004057 | 0.019509  | 212.8  | 78.8   | 2.701  | <a href="#">1368754_at</a>   | pyrimidinergic receptor P2Y, G-protein coupled, 6                       | <a href="#">Info</a> | <a href="#">P2ry6</a>            |
| 209 | 0.0004059 | 0.019509  | 1830.9 | 1011.8 | 1.81   | <a href="#">1367765_at</a>   | transcobalamin 2                                                        | <a href="#">Info</a> | <a href="#">Tcn2</a>             |
| 210 | 0.0004081 | 0.019509  | 47.3   | 25.6   | 1.848  | <a href="#">1382663_at</a>   | basic leucine zipper transcription factor, ATF-like (predicted)         | <a href="#">Info</a> | <a href="#">Batf_predicted</a>   |
| 211 | 0.0004089 | 0.019509  | 154.3  | 261.6  | 0.59   | <a href="#">1373935_at</a>   | polymerase (DNA directed), delta 2, regulatory subunit (predicted)      | <a href="#">Info</a> | <a href="#">Pold2_predicted</a>  |
| 212 | 0.0004179 | 0.0197953 | 377.8  | 640    | 0.59   | <a href="#">1382612_at</a>   | Transcribed locus                                                       | <a href="#">Info</a> |                                  |
| 213 | 0.0004194 | 0.0197953 | 21     | 34     | 0.618  | <a href="#">1389506_x_at</a> |                                                                         | <a href="#">Info</a> |                                  |
| 214 | 0.0004251 | 0.0197953 | 870.1  | 504.7  | 1.724  | <a href="#">1383842_at</a>   | Galactosidase, beta 1-like (predicted)                                  | <a href="#">Info</a> |                                  |
| 215 | 0.0004255 | 0.0197953 | 171.6  | 273.8  | 0.627  | <a href="#">1372343_at</a>   | exosome component 8 (predicted)                                         | <a href="#">Info</a> | <a href="#">Exosc8_predicted</a> |
| 216 | 0.000426  | 0.0197953 | 60.1   | 112.5  | 0.534  | <a href="#">1374961_at</a>   |                                                                         | <a href="#">Info</a> |                                  |
| 217 | 0.0004267 | 0.0197953 | 47.6   | 153    | 0.311  | <a href="#">1383926_at</a>   | budding uninhibited by benzimidazoles 1 homolog, beta (S. cerevisiae)   | <a href="#">Info</a> | <a href="#">Bub1b</a>            |
| 218 | 0.0004337 | 0.0199409 | 5394.1 | 8693.8 | 0.62   | <a href="#">1376749_at</a>   | osteolectin (predicted)                                                 | <a href="#">Info</a> | <a href="#">Ogn_predicted</a>    |
| 219 | 0.0004338 | 0.0199409 | 60.6   | 166.7  | 0.364  | <a href="#">1376039_at</a>   | serine/threonine kinase 6                                               | <a href="#">Info</a> | <a href="#">Stk6</a>             |
| 220 | 0.0004376 | 0.0199595 | 182.8  | 352.6  | 0.518  | <a href="#">1381933_at</a>   | Transcribed locus                                                       | <a href="#">Info</a> |                                  |
| 221 | 0.0004382 | 0.0199595 | 40.9   | 88.5   | 0.462  | <a href="#">1370178_at</a>   | calcium channel, voltage-dependent, beta 2 subunit                      | <a href="#">Info</a> | <a href="#">Cacnb2</a>           |

|     |           |           |        |        |       |                            |                                                                                                                 |                      |                                    |
|-----|-----------|-----------|--------|--------|-------|----------------------------|-----------------------------------------------------------------------------------------------------------------|----------------------|------------------------------------|
| 222 | 0.0004418 | 0.0199595 | 649.9  | 421.6  | 1.542 | <a href="#">1382048_at</a> | ATPase, H+ transporting, V1 subunit A, isoform 1 (predicted)                                                    | <a href="#">Info</a> | <a href="#">Atp6v1a1_predicted</a> |
| 223 | 0.0004442 | 0.0199595 | 151.4  | 256.5  | 0.59  | <a href="#">1382978_at</a> | Transcribed locus                                                                                               | <a href="#">Info</a> |                                    |
| 224 | 0.0004444 | 0.0199595 | 84.4   | 34.1   | 2.475 | <a href="#">1379660_at</a> | Transcribed locus                                                                                               | <a href="#">Info</a> |                                    |
| 225 | 0.0004461 | 0.0199595 | 304    | 671.8  | 0.453 | <a href="#">1389601_at</a> | CDNA clone IMAGE:7308494                                                                                        | <a href="#">Info</a> |                                    |
| 226 | 0.0004482 | 0.0199647 | 228.1  | 366.4  | 0.623 | <a href="#">1374840_at</a> |                                                                                                                 | <a href="#">Info</a> |                                    |
| 227 | 0.0004539 | 0.0201296 | 59.6   | 94     | 0.634 | <a href="#">1385164_at</a> | Similar to solute carrier family 16 (monocarboxylic acid transporters), member 4                                | <a href="#">Info</a> |                                    |
| 228 | 0.0004583 | 0.0202351 | 62.9   | 115.2  | 0.546 | <a href="#">1397307_at</a> | Similar to Tescalcin                                                                                            | <a href="#">Info</a> |                                    |
| 229 | 0.0004603 | 0.0202351 | 41.6   | 23.7   | 1.755 | <a href="#">1378490_at</a> | Autism susceptibility candidate 2 (predicted)                                                                   | <a href="#">Info</a> |                                    |
| 230 | 0.0004653 | 0.020317  | 65.3   | 177    | 0.369 | <a href="#">1395376_at</a> | DEAD/H (Asp-Glu-Ala-Asp/His) box polypeptide 11 (CHL1-like helicase homolog, <i>S. cerevisiae</i> ) (predicted) | <a href="#">Info</a> | <a href="#">Ddx11_predicted</a>    |
| 231 | 0.0004662 | 0.020317  | 1387.8 | 916    | 1.515 | <a href="#">1399019_at</a> | abhydrolase domain containing 4 (predicted)                                                                     | <a href="#">Info</a> | <a href="#">Abhd4_predicted</a>    |
| 232 | 0.0004703 | 0.0204074 | 21.6   | 44.6   | 0.484 | <a href="#">1381321_at</a> | Similar to RIKEN cDNA D030060M11 (predicted)                                                                    | <a href="#">Info</a> |                                    |
| 233 | 0.000473  | 0.0204364 | 773.4  | 144    | 5.371 | <a href="#">1380318_at</a> | LOC499196                                                                                                       | <a href="#">Info</a> |                                    |
| 234 | 0.0004757 | 0.0204653 | 48.2   | 85.2   | 0.566 | <a href="#">1368811_at</a> | lamin B1                                                                                                        | <a href="#">Info</a> | <a href="#">Lmnb1</a>              |
| 235 | 0.0004785 | 0.0204981 | 36.9   | 24.6   | 1.5   | <a href="#">1379970_at</a> | similar to Eph receptor A4                                                                                      | <a href="#">Info</a> | <a href="#">LOC316539</a>          |
| 236 | 0.0004824 | 0.0205776 | 24     | 12     | 2     | <a href="#">1368751_at</a> | potassium voltage-gated channel, delayed-rectifier, subfamily S, member 3                                       | <a href="#">Info</a> | <a href="#">Kcns3</a>              |
| 237 | 0.0004859 | 0.0206395 | 968.3  | 1557.4 | 0.622 | <a href="#">1373983_at</a> | LOC360807                                                                                                       | <a href="#">Info</a> | <a href="#">LOC360807</a>          |
| 238 | 0.0004958 | 0.0209715 | 91.1   | 22.9   | 3.978 | <a href="#">1372682_at</a> | similar to RIKEN cDNA 2810432L12 (predicted)                                                                    | <a href="#">Info</a> | <a href="#">RGD1307218_prec</a>    |
| 239 | 0.0004991 | 0.0210228 | 98.4   | 54.4   | 1.809 | <a href="#">1375093_at</a> | ribokinase (predicted)                                                                                          | <a href="#">Info</a> | <a href="#">Rbks_predicted</a>     |
| 240 | 0.0005027 | 0.0210446 | 444.2  | 236.8  | 1.876 | <a href="#">1374265_at</a> | Similar to arylacetamide deacetylase (esterase) (predicted)                                                     | <a href="#">Info</a> |                                    |
| 241 | 0.0005038 | 0.0210446 | 57.5   | 25     | 2.3   | <a href="#">1387058_at</a> | phosphatidylcholine transfer protein                                                                            | <a href="#">Info</a> | <a href="#">Pctp</a>               |
| 242 | 0.000506  | 0.0210492 | 714.9  | 96.1   | 7.439 | <a href="#">1383392_at</a> | complement component 2                                                                                          | <a href="#">Info</a> | <a href="#">C2</a>                 |
| 243 | 0.0005108 | 0.0211614 | 27.2   | 171.5  | 0.159 | <a href="#">1376106_at</a> | similar to hypothetical protein MGC33926                                                                        | <a href="#">Info</a> | <a href="#">RGD:1303057</a>        |
| 244 | 0.0005155 | 0.0212686 | 19.4   | 13.4   | 1.448 | <a href="#">1381388_at</a> | similar to Nasopharyngeal epithelium specific protein 1                                                         | <a href="#">Info</a> | <a href="#">MGC116217</a>          |
| 245 | 0.0005177 | 0.0212722 | 35.2   | 19.4   | 1.814 | <a href="#">1373480_at</a> | Transcribed locus                                                                                               | <a href="#">Info</a> |                                    |
| 246 | 0.0005258 | 0.0215172 | 173.9  | 51.1   | 3.403 | <a href="#">1393638_at</a> | Prostaglandin E receptor 4 (subtype EP4)                                                                        | <a href="#">Info</a> | <a href="#">Ptger4</a>             |
| 247 | 0.0005389 | 0.0218326 | 309.7  | 464.5  | 0.667 | <a href="#">1378360_at</a> | Transcribed locus                                                                                               | <a href="#">Info</a> |                                    |
| 248 | 0.0005422 | 0.0218326 | 97.2   | 170.2  | 0.571 | <a href="#">1382370_at</a> | cyclin F                                                                                                        | <a href="#">Info</a> | <a href="#">Ccnf</a>               |
| 249 | 0.000543  | 0.0218326 | 92.4   | 177.6  | 0.52  | <a href="#">1394651_at</a> | similar to hypothetical protein FLJ32884 (predicted)                                                            | <a href="#">Info</a> | <a href="#">RGD1309453_prec</a>    |
| 250 | 0.0005463 | 0.0218326 | 23     | 9.5    | 2.421 | <a href="#">1392633_at</a> | Transcribed locus                                                                                               | <a href="#">Info</a> |                                    |
| 251 | 0.0005471 | 0.0218326 | 12.8   | 7.9    | 1.62  | <a href="#">1390557_at</a> | Transcribed locus                                                                                               | <a href="#">Info</a> |                                    |
| 252 | 0.0005475 | 0.0218326 | 247.3  | 167.3  | 1.478 | <a href="#">1373869_at</a> | sterol O-acyltransferase 1                                                                                      | <a href="#">Info</a> | <a href="#">Soat1</a>              |
| 253 | 0.0005489 | 0.0218326 | 105.7  | 36     | 2.936 | <a href="#">1374959_at</a> | NAD(P)H dehydrogenase, quinone 2                                                                                | <a href="#">Info</a> | <a href="#">RGD:1303320</a>        |



|     |           |           |        |        |        |                            |                                                                                                                                                                                          |                      |                                                                                                                                |
|-----|-----------|-----------|--------|--------|--------|----------------------------|------------------------------------------------------------------------------------------------------------------------------------------------------------------------------------------|----------------------|--------------------------------------------------------------------------------------------------------------------------------|
| 254 | 0.0005523 | 0.0218326 | 180.4  | 100.3  | 1.799  | <a href="#">1390863_at</a> | solute carrier family 19 (thiamine transporter), member 2 (predicted)                                                                                                                    | <a href="#">Info</a> | <a href="#">Slc19a2_predicted</a>                                                                                              |
| 255 | 0.0005555 | 0.0218326 | 66.4   | 25.3   | 2.625  | <a href="#">1391089_at</a> | similar to RGD1309360_predicted protein                                                                                                                                                  | <a href="#">Info</a> | <a href="#">LOC499521</a>                                                                                                      |
| 256 | 0.0005575 | 0.0218326 | 2620.2 | 1577.7 | 1.661  | <a href="#">1390021_at</a> | histone 1, H2bh (predicted)                                                                                                                                                              | <a href="#">Info</a> | <a href="#">Hist1h2bh_predict</a>                                                                                              |
| 257 | 0.0005583 | 0.0218326 | 33.9   | 142.3  | 0.238  | <a href="#">1384512_at</a> |                                                                                                                                                                                          | <a href="#">Info</a> |                                                                                                                                |
| 258 | 0.000561  | 0.0218326 | 70     | 28.4   | 2.465  | <a href="#">1378684_at</a> | rad and gem related GTP binding protein 1 (predicted)                                                                                                                                    | <a href="#">Info</a> | <a href="#">Rem1_predicted</a>                                                                                                 |
| 259 | 0.0005617 | 0.0218326 | 217    | 332.8  | 0.652  | <a href="#">1388436_at</a> | small nuclear ribonucleoprotein polypeptide A (predicted)                                                                                                                                | <a href="#">Info</a> | <a href="#">Snrpa_predicted</a>                                                                                                |
| 260 | 0.0005706 | 0.0220932 | 77.8   | 161.3  | 0.482  | <a href="#">1376055_at</a> | Transcribed locus                                                                                                                                                                        | <a href="#">Info</a> |                                                                                                                                |
| 261 | 0.0005771 | 0.0222593 | 389.6  | 22.3   | 17.471 | <a href="#">1368885_at</a> | ectonucleoside triphosphate diphosphohydrolase 1                                                                                                                                         | <a href="#">Info</a> | <a href="#">Entpd1</a>                                                                                                         |
| 262 | 0.0005813 | 0.0223357 | 42.3   | 84.6   | 0.5    | <a href="#">1377175_at</a> | Similar to hypothetical protein A730008H23 (predicted)                                                                                                                                   | <a href="#">Info</a> |                                                                                                                                |
| 263 | 0.0005849 | 0.0223885 | 75.6   | 44.4   | 1.703  | <a href="#">1382027_at</a> | LOC498010                                                                                                                                                                                | <a href="#">Info</a> | <a href="#">Itgb3</a>                                                                                                          |
| 264 | 0.0005981 | 0.0225541 | 604.8  | 1099.4 | 0.55   | <a href="#">1373369_at</a> | Transcribed locus                                                                                                                                                                        | <a href="#">Info</a> |                                                                                                                                |
| 265 | 0.000601  | 0.0225541 | 70.9   | 23.1   | 3.069  | <a href="#">1397184_at</a> | Transcribed locus, strongly similar to XP_137017.3 PREDICTED: hypothetical protein XP_137017 [Mus musculus]                                                                              | <a href="#">Info</a> |                                                                                                                                |
| 266 | 0.0006019 | 0.0225541 | 210.9  | 329.6  | 0.64   | <a href="#">1383384_at</a> | TATA box binding protein-like 1 (predicted)                                                                                                                                              | <a href="#">Info</a> |                                                                                                                                |
| 267 | 0.0006022 | 0.0225541 | 16.6   | 26.9   | 0.617  | <a href="#">1380397_at</a> | LOC499812                                                                                                                                                                                | <a href="#">Info</a> |                                                                                                                                |
| 268 | 0.0006036 | 0.0225541 | 34.1   | 14.6   | 2.336  | <a href="#">1368393_at</a> | lymphocyte antigen 68                                                                                                                                                                    | <a href="#">Info</a> | <a href="#">C1qr1</a>                                                                                                          |
| 269 | 0.0006043 | 0.0225541 | 16.1   | 76.4   | 0.211  | <a href="#">1392870_at</a> |                                                                                                                                                                                          | <a href="#">Info</a> |                                                                                                                                |
| 270 | 0.0006067 | 0.0225541 | 41     | 16.4   | 2.5    | <a href="#">1387365_at</a> | nuclear receptor subfamily 1, group H, member 3                                                                                                                                          | <a href="#">Info</a> | <a href="#">Nr1h3</a>                                                                                                          |
| 271 | 0.0006153 | 0.0225541 | 14.1   | 8.3    | 1.699  | <a href="#">1398479_at</a> | Transcribed locus, weakly similar to NP_996757.1 ryanodine receptor type 3 [Gallus gallus]                                                                                               | <a href="#">Info</a> |                                                                                                                                |
| 272 | 0.0006156 | 0.0225541 | 80.6   | 191    | 0.422  | <a href="#">1376470_at</a> | formin binding protein 4 (predicted)                                                                                                                                                     | <a href="#">Info</a> | <a href="#">Fbnp4_predicted</a>                                                                                                |
| 273 | 0.0006206 | 0.0225541 | 28     | 60.8   | 0.461  | <a href="#">1391731_at</a> | High mobility group box transcription factor 1                                                                                                                                           | <a href="#">Info</a> | <a href="#">Hbp1</a>                                                                                                           |
| 274 | 0.0006223 | 0.0225541 | 134.3  | 16.3   | 8.239  | <a href="#">1374474_at</a> | Transcribed locus, strongly similar to NP_080091.1 copine family member [Mus musculus]                                                                                                   | <a href="#">Info</a> |                                                                                                                                |
| 275 | 0.0006254 | 0.0225541 | 1486.2 | 873.9  | 1.701  | <a href="#">1377742_at</a> | Transcribed locus                                                                                                                                                                        | <a href="#">Info</a> |                                                                                                                                |
| 276 | 0.0006314 | 0.0225541 | 178.5  | 43.9   | 4.066  | <a href="#">1388166_at</a> | similar to Igh-6 protein /// similar to Ig H-chain V-region precursor /// similar to single chain Fv antibody fragment scFv 7-10A /// similar to Ig heavy chain V region MC101 precursor | <a href="#">Info</a> | <a href="#">RGD:1359202 ///</a><br><a href="#">LOC299458 ///</a><br><a href="#">LOC314509 ///</a><br><a href="#">LOC366747</a> |
| 277 | 0.0006316 | 0.0225541 | 1148.4 | 614.6  | 1.869  | <a href="#">1371432_at</a> |                                                                                                                                                                                          | <a href="#">Info</a> |                                                                                                                                |
| 278 | 0.0006359 | 0.0225541 | 79.8   | 52.2   | 1.529  | <a href="#">1380137_at</a> | Transcribed locus                                                                                                                                                                        | <a href="#">Info</a> |                                                                                                                                |
| 279 | 0.0006475 | 0.0225541 | 9.8    | 30.5   | 0.321  | <a href="#">1381620_at</a> | Fat tumor suppressor homolog (Drosophila)                                                                                                                                                | <a href="#">Info</a> | <a href="#">Fat</a>                                                                                                            |
| 280 | 0.0006478 | 0.0225541 | 204.9  | 120.7  | 1.698  | <a href="#">1377669_at</a> | low Mr GTP-binding protein                                                                                                                                                               | <a href="#">Info</a> | <a href="#">Rab27a</a>                                                                                                         |
| 281 | 0.0006489 | 0.0225541 | 321.3  | 540.9  | 0.594  | <a href="#">1388744_at</a> | minichromosome maintenance protein 7                                                                                                                                                     | <a href="#">Info</a> | <a href="#">RGD:1303018</a>                                                                                                    |
| 282 | 0.000649  | 0.0225541 | 70.9   | 172    | 0.412  | <a href="#">1374799_at</a> | similar to mKIAA0159 protein                                                                                                                                                             | <a href="#">Info</a> | <a href="#">LOC362438</a>                                                                                                      |

|     |           |           |        |        |        |                              |                                                                                                        |                      |                                                                                                                                                                                                                                                                                                   |
|-----|-----------|-----------|--------|--------|--------|------------------------------|--------------------------------------------------------------------------------------------------------|----------------------|---------------------------------------------------------------------------------------------------------------------------------------------------------------------------------------------------------------------------------------------------------------------------------------------------|
| 283 | 0.0006493 | 0.0225541 | 298.3  | 137.6  | 2.168  | <a href="#">1397300_at</a>   | Transcribed locus                                                                                      | <a href="#">Info</a> |                                                                                                                                                                                                                                                                                                   |
| 284 | 0.00065   | 0.0225541 | 126.1  | 48     | 2.627  | <a href="#">1394422_at</a>   | similar to hypothetical protein FLJ23033                                                               | <a href="#">Info</a> | <a href="#">LOC310982</a>                                                                                                                                                                                                                                                                         |
| 285 | 0.000652  | 0.0225541 | 165.7  | 25.8   | 6.422  | <a href="#">1378396_at</a>   | Bone specific CMF608                                                                                   | <a href="#">Info</a> | <a href="#">Igsf10</a>                                                                                                                                                                                                                                                                            |
| 286 | 0.000653  | 0.0225541 | 97     | 34.8   | 2.787  | <a href="#">1373979_at</a>   | CDNA clone MGC:112715 IMAGE:7377326                                                                    | <a href="#">Info</a> |                                                                                                                                                                                                                                                                                                   |
| 287 | 0.0006578 | 0.0225541 | 32.5   | 51.4   | 0.632  | <a href="#">1380625_at</a>   | CCR4-NOT transcription complex, subunit 4 (predicted)                                                  | <a href="#">Info</a> |                                                                                                                                                                                                                                                                                                   |
| 288 | 0.0006583 | 0.0225541 | 1115   | 303.6  | 3.673  | <a href="#">1372168_s_at</a> | insulin-like growth factor binding protein 6                                                           | <a href="#">Info</a> | <a href="#">Igfbp6</a>                                                                                                                                                                                                                                                                            |
| 289 | 0.0006596 | 0.0225541 | 881.8  | 70.2   | 12.561 | <a href="#">1393219_at</a>   | complement component 2                                                                                 | <a href="#">Info</a> | <a href="#">C2</a>                                                                                                                                                                                                                                                                                |
| 290 | 0.0006612 | 0.0225541 | 95.9   | 20     | 4.795  | <a href="#">1371014_at</a>   | phospholipase C, beta 1                                                                                | <a href="#">Info</a> | <a href="#">Plcb1</a>                                                                                                                                                                                                                                                                             |
| 291 | 0.0006631 | 0.0225541 | 94.8   | 26     | 3.646  | <a href="#">1397537_at</a>   |                                                                                                        | <a href="#">Info</a> | <a href="#">LOC363433 ///</a><br><a href="#">LOC363434 ///</a><br><a href="#">LOC367381 ///</a><br><a href="#">LOC500070 ///</a><br><a href="#">LOC501091 ///</a><br><a href="#">LOC501092 ///</a><br><a href="#">LOC501221 ///</a><br><a href="#">LOC501222 ///</a><br><a href="#">LOC501399</a> |
| 292 | 0.0006642 | 0.0225541 | 135.4  | 15.5   | 8.735  | <a href="#">1379482_at</a>   | transmembrane 6 superfamily member 1 (predicted)                                                       | <a href="#">Info</a> | <a href="#">Tm6sf1_predicted</a>                                                                                                                                                                                                                                                                  |
| 293 | 0.0006652 | 0.0225541 | 2206.2 | 943.7  | 2.338  | <a href="#">1372706_at</a>   | hexosaminidase B (predicted)                                                                           | <a href="#">Info</a> | <a href="#">Hexb_predicted</a>                                                                                                                                                                                                                                                                    |
| 294 | 0.000667  | 0.0225541 | 151.9  | 340.8  | 0.446  | <a href="#">1371042_at</a>   | mitogen-activated protein kinase kinase kinase 3                                                       | <a href="#">Info</a> | <a href="#">Map4k3</a>                                                                                                                                                                                                                                                                            |
| 295 | 0.0006673 | 0.0225541 | 207.8  | 136    | 1.528  | <a href="#">1381297_at</a>   | Rho guanine nucleotide exchange factor (GEF) 5                                                         | <a href="#">Info</a> | <a href="#">Arhgef5</a>                                                                                                                                                                                                                                                                           |
| 296 | 0.0006691 | 0.0225541 | 126.5  | 325.4  | 0.389  | <a href="#">1384280_at</a>   | Nucleolar and spindle associated protein 1 (predicted)                                                 | <a href="#">Info</a> |                                                                                                                                                                                                                                                                                                   |
| 297 | 0.0006709 | 0.0225541 | 427    | 269.7  | 1.583  | <a href="#">1383982_at</a>   | Transcribed locus                                                                                      | <a href="#">Info</a> |                                                                                                                                                                                                                                                                                                   |
| 298 | 0.0006747 | 0.0225541 | 242.4  | 412.4  | 0.588  | <a href="#">1373194_at</a>   | caspase 8 associated protein 2 (predicted)                                                             | <a href="#">Info</a> | <a href="#">Casp8ap2_predicte</a>                                                                                                                                                                                                                                                                 |
| 299 | 0.0006747 | 0.0225541 | 51.2   | 130.2  | 0.393  | <a href="#">1382783_at</a>   | Bloom syndrome (predicted)                                                                             | <a href="#">Info</a> | <a href="#">Blm_predicted</a>                                                                                                                                                                                                                                                                     |
| 300 | 0.0006758 | 0.0225541 | 5145.2 | 3136   | 1.641  | <a href="#">1368504_at</a>   | lysosomal membrane glycoprotein 1                                                                      | <a href="#">Info</a> | <a href="#">Lamp1</a>                                                                                                                                                                                                                                                                             |
| 301 | 0.0006762 | 0.0225541 | 5181.5 | 3251.7 | 1.593  | <a href="#">1398892_at</a>   | Niemann Pick type C2                                                                                   | <a href="#">Info</a> | <a href="#">Npc2</a>                                                                                                                                                                                                                                                                              |
| 302 | 0.0006766 | 0.0225541 | 560.2  | 95.1   | 5.891  | <a href="#">1381993_at</a>   | chloride intracellular channel 2 (predicted)                                                           | <a href="#">Info</a> | <a href="#">Clie2_predicted</a>                                                                                                                                                                                                                                                                   |
| 303 | 0.0006809 | 0.0226225 | 672.5  | 359.4  | 1.871  | <a href="#">1391282_at</a>   | Transcribed locus, moderately similar to XP_484071.1 PREDICTED: similar to Als2 protein [Mus musculus] | <a href="#">Info</a> |                                                                                                                                                                                                                                                                                                   |
| 304 | 0.0006857 | 0.022707  | 58.1   | 26.8   | 2.168  | <a href="#">1376574_at</a>   | Lymphocyte antigen 68                                                                                  | <a href="#">Info</a> | <a href="#">C1qr1</a>                                                                                                                                                                                                                                                                             |
| 305 | 0.0006962 | 0.0229792 | 22     | 51.3   | 0.429  | <a href="#">1377410_at</a>   | similar to hypothetical protein FLJ23311 (predicted)                                                   | <a href="#">Info</a> | <a href="#">RGD1308091_prec</a>                                                                                                                                                                                                                                                                   |
| 306 | 0.0006996 | 0.0230159 | 1398.5 | 2263   | 0.618  | <a href="#">1371365_at</a>   | similar to Ubiquitin-conjugating enzyme E2S                                                            | <a href="#">Info</a> | <a href="#">LOC292588</a>                                                                                                                                                                                                                                                                         |
| 307 | 0.0007034 | 0.0230656 | 525.7  | 850.5  | 0.618  | <a href="#">1373217_at</a>   | Transcribed locus                                                                                      | <a href="#">Info</a> |                                                                                                                                                                                                                                                                                                   |
| 308 | 0.0007069 | 0.0231051 | 241.2  | 933.6  | 0.258  | <a href="#">1385871_at</a>   | DEAH (Asp-Glu-Ala-His) box polypeptide 36 (predicted)                                                  | <a href="#">Info</a> |                                                                                                                                                                                                                                                                                                   |
| 309 | 0.0007107 | 0.023106  | 141    | 37.9   | 3.72   | <a href="#">1368280_at</a>   | cathepsin C                                                                                            | <a href="#">Info</a> | <a href="#">Ctsc</a>                                                                                                                                                                                                                                                                              |
| 310 | 0.0007133 | 0.023106  | 46.8   | 20.1   | 2.328  | <a href="#">1385909_at</a>   | Transcribed locus                                                                                      | <a href="#">Info</a> |                                                                                                                                                                                                                                                                                                   |

|            |           |           |        |        |       |                              |                                                                                                                  |                      |                                      |
|------------|-----------|-----------|--------|--------|-------|------------------------------|------------------------------------------------------------------------------------------------------------------|----------------------|--------------------------------------|
| <b>311</b> | 0.0007147 | 0.023106  | 541.6  | 343.3  | 1.578 | <a href="#">1398254_at</a>   | renin binding protein                                                                                            | <a href="#">Info</a> | <a href="#">Renbp</a>                |
| <b>312</b> | 0.0007164 | 0.023106  | 301.9  | 94     | 3.212 | <a href="#">1398333_at</a>   | Endothelial PAS domain protein 1                                                                                 | <a href="#">Info</a> | <a href="#">Epas1</a>                |
| <b>313</b> | 0.0007186 | 0.023106  | 191.1  | 79.2   | 2.413 | <a href="#">1379402_at</a>   | ATP-binding cassette, sub-family C (CFTR/MRP), member 4                                                          | <a href="#">Info</a> | <a href="#">Abcc4</a>                |
| <b>314</b> | 0.0007207 | 0.023106  | 98.1   | 166    | 0.591 | <a href="#">1373468_at</a>   | Transcribed locus                                                                                                | <a href="#">Info</a> |                                      |
| <b>315</b> | 0.0007238 | 0.0231317 | 1201.1 | 808.3  | 1.486 | <a href="#">1379255_at</a>   | ATPase, H+ transporting, lysosomal accessory protein 2                                                           | <a href="#">Info</a> | <a href="#">Atp6ap2</a>              |
| <b>316</b> | 0.0007274 | 0.0231732 | 31.2   | 118.5  | 0.263 | <a href="#">1385185_at</a>   | Transcribed locus                                                                                                | <a href="#">Info</a> |                                      |
| <b>317</b> | 0.000738  | 0.0233245 | 40.6   | 84.2   | 0.482 | <a href="#">1396645_at</a>   | Transcribed locus                                                                                                | <a href="#">Info</a> |                                      |
| <b>318</b> | 0.0007384 | 0.0233245 | 160.2  | 316.6  | 0.506 | <a href="#">1374465_at</a>   | similar to ubiquitously-expressed transcript isoform 1                                                           | <a href="#">Info</a> | <a href="#">RGD:1359326</a>          |
| <b>319</b> | 0.0007391 | 0.0233245 | 622.5  | 279.1  | 2.23  | <a href="#">1390387_at</a>   | Similar to SH3 domain protein D19 (predicted)                                                                    | <a href="#">Info</a> |                                      |
| <b>320</b> | 0.0007434 | 0.0233869 | 44     | 84.4   | 0.521 | <a href="#">1393168_at</a>   | Similar to Mbt domain containing 1                                                                               | <a href="#">Info</a> |                                      |
| <b>321</b> | 0.0007461 | 0.0233987 | 129.2  | 34.5   | 3.745 | <a href="#">1372579_at</a>   | Endoglin                                                                                                         | <a href="#">Info</a> |                                      |
| <b>322</b> | 0.0007503 | 0.0234574 | 33.4   | 70.5   | 0.474 | <a href="#">1369468_at</a>   | frizzled homolog 4 (Drosophila)                                                                                  | <a href="#">Info</a> | <a href="#">Fzd4</a>                 |
| <b>323</b> | 0.0007597 | 0.0235974 | 1684.3 | 1114.9 | 1.511 | <a href="#">1382101_at</a>   | heparan sulfate 2-O-sulfotransferase 1 (predicted)                                                               | <a href="#">Info</a> | <a href="#">Hs2st1_predicted</a>     |
| <b>324</b> | 0.0007622 | 0.0235974 | 88.6   | 172.6  | 0.513 | <a href="#">1374225_at</a>   | CDNA clone IMAGE:7389359                                                                                         | <a href="#">Info</a> |                                      |
| <b>325</b> | 0.000764  | 0.0235974 | 120.4  | 265.8  | 0.453 | <a href="#">1398440_at</a>   | Transcribed locus                                                                                                | <a href="#">Info</a> |                                      |
| <b>326</b> | 0.0007645 | 0.0235974 | 43.1   | 90.6   | 0.476 | <a href="#">1377718_at</a>   | similar to CDNA sequence BC022692                                                                                | <a href="#">Info</a> | <a href="#">LOC501552</a>            |
| <b>327</b> | 0.0007665 | 0.0235974 | 23.5   | 13     | 1.808 | <a href="#">1370248_at</a>   | FXYP domain-containing ion transport regulator 6                                                                 | <a href="#">Info</a> | <a href="#">Fxyd6</a>                |
| <b>328</b> | 0.0007721 | 0.0235995 | 83.1   | 144.9  | 0.573 | <a href="#">1390769_at</a>   | Ribose-phosphate pyrophosphokinase I -like                                                                       | <a href="#">Info</a> | <a href="#">LOC314140</a>            |
| <b>329</b> | 0.0007734 | 0.0235995 | 32.1   | 66.4   | 0.483 | <a href="#">1393405_at</a>   | Transcribed locus                                                                                                | <a href="#">Info</a> |                                      |
| <b>330</b> | 0.0007736 | 0.0235995 | 77     | 228.7  | 0.337 | <a href="#">1390891_at</a>   | similar to Kinesin family member 11                                                                              | <a href="#">Info</a> | <a href="#">LOC499350</a>            |
| <b>331</b> | 0.0007777 | 0.0236529 | 45     | 76.4   | 0.589 | <a href="#">1394976_at</a>   | Similar to HN1-like protein (predicted)                                                                          | <a href="#">Info</a> | <a href="#">Hn11</a>                 |
| <b>332</b> | 0.0007816 | 0.0236952 | 15.2   | 8.9    | 1.708 | <a href="#">1397791_at</a>   | Transcribed locus                                                                                                | <a href="#">Info</a> |                                      |
| <b>333</b> | 0.0007838 | 0.0236952 | 157.3  | 23     | 6.839 | <a href="#">1372926_at</a>   | Synapsin III                                                                                                     | <a href="#">Info</a> | <a href="#">Syn3</a>                 |
| <b>334</b> | 0.0007943 | 0.0238693 | 56     | 856.5  | 0.065 | <a href="#">1389581_at</a>   | similar to RIKEN cDNA 9230117N10 (predicted)                                                                     | <a href="#">Info</a> | <a href="#">RGD1311155_predicted</a> |
| <b>335</b> | 0.0007943 | 0.0238693 | 39.9   | 87.7   | 0.455 | <a href="#">1379562_at</a>   | Transcribed locus                                                                                                | <a href="#">Info</a> |                                      |
| <b>336</b> | 0.0007984 | 0.0239211 | 25.9   | 13.6   | 1.904 | <a href="#">1378436_at</a>   | Transcribed locus, weakly similar to XP_524755.1 PREDICTED: similar to RNA processing factor 1 [Pan troglodytes] | <a href="#">Info</a> |                                      |
| <b>337</b> | 0.0008053 | 0.0240268 | 38.2   | 23.6   | 1.619 | <a href="#">1377632_at</a>   |                                                                                                                  | <a href="#">Info</a> |                                      |
| <b>338</b> | 0.0008067 | 0.0240268 | 45.3   | 88.1   | 0.514 | <a href="#">1394839_at</a>   | Phosphoribosylglycinamide formyltransferase (predicted)                                                          | <a href="#">Info</a> |                                      |
| <b>339</b> | 0.0008171 | 0.0242018 | 202.8  | 432.5  | 0.469 | <a href="#">1377846_a_at</a> | mutS homolog 6 (E. coli) (predicted)                                                                             | <a href="#">Info</a> | <a href="#">Msh6_predicted</a>       |
| <b>340</b> | 0.0008191 | 0.0242018 | 22.7   | 60.1   | 0.378 | <a href="#">1395942_at</a>   | Transcribed locus                                                                                                | <a href="#">Info</a> |                                      |
| <b>341</b> | 0.0008201 | 0.0242018 | 74.9   | 190.9  | 0.392 | <a href="#">1370999_at</a>   | sperm associated antigen 5                                                                                       | <a href="#">Info</a> | <a href="#">Spag5</a>                |
| <b>342</b> | 0.000823  | 0.0242018 | 179.6  | 34.7   | 5.176 | <a href="#">1393084_at</a>   |                                                                                                                  | <a href="#">Info</a> |                                      |
| <b>343</b> | 0.000825  | 0.0242018 | 24.8   | 10.7   | 2.318 | <a href="#">1368416_at</a>   | integrin binding sialoprotein                                                                                    | <a href="#">Info</a> | <a href="#">Ibsp</a>                 |
| <b>344</b> | 0.000827  | 0.0242018 | 275.3  | 412.2  | 0.668 | <a href="#">1389131_at</a>   | similar to C330027I04Rik protein                                                                                 | <a href="#">Info</a> | <a href="#">RGD:1359229</a>          |

|     |           |           |       |        |       |                              |                                                                               |                      |                                   |
|-----|-----------|-----------|-------|--------|-------|------------------------------|-------------------------------------------------------------------------------|----------------------|-----------------------------------|
| 345 | 0.0008353 | 0.0243546 | 22.9  | 15.8   | 1.449 | <a href="#">1396345_at</a>   |                                                                               | <a href="#">Info</a> |                                   |
| 346 | 0.0008393 | 0.0243546 | 83.1  | 32.4   | 2.565 | <a href="#">1382311_at</a>   | TRAF2 binding protein                                                         | <a href="#">Info</a> | <a href="#">RGD:1359151</a>       |
| 347 | 0.0008406 | 0.0243546 | 147.9 | 215    | 0.688 | <a href="#">1382679_at</a>   | similar to WD-repeat protein 43                                               | <a href="#">Info</a> | <a href="#">LOC362703</a>         |
| 348 | 0.0008419 | 0.0243546 | 392.5 | 1234.5 | 0.318 | <a href="#">1368565_at</a>   | solute carrier family 1 (glial high affinity glutamate transporter), member 3 | <a href="#">Info</a> | <a href="#">Slc1a3</a>            |
| 349 | 0.000845  | 0.0243743 | 160.8 | 236    | 0.681 | <a href="#">1379097_at</a>   | Transcribed locus                                                             | <a href="#">Info</a> |                                   |
| 350 | 0.000849  | 0.0244197 | 25.1  | 14     | 1.793 | <a href="#">1370628_at</a>   | granzyme B                                                                    | <a href="#">Info</a> | <a href="#">Gzmb</a>              |
| 351 | 0.0008576 | 0.0245469 | 404.7 | 177.3  | 2.283 | <a href="#">1370080_at</a>   | heme oxygenase (decycling) 1                                                  | <a href="#">Info</a> | <a href="#">Hmox1</a>             |
| 352 | 0.0008583 | 0.0245469 | 129.7 | 226.4  | 0.573 | <a href="#">1370075_at</a>   | dihydrofolate reductase                                                       | <a href="#">Info</a> | <a href="#">Dhfr</a>              |
| 353 | 0.0008615 | 0.0245686 | 140.3 | 40.2   | 3.49  | <a href="#">1387914_at</a>   | cytochrome P450, family 27, subfamily a, polypeptide 1                        | <a href="#">Info</a> | <a href="#">Cyp27a1</a>           |
| 354 | 0.0008652 | 0.0246044 | 86.6  | 179.6  | 0.482 | <a href="#">1374219_at</a>   | dispatched homolog 1 (Drosophila) (predicted)                                 | <a href="#">Info</a> | <a href="#">Disp1_predicted</a>   |
| 355 | 0.000873  | 0.0247563 | 67.8  | 46.2   | 1.468 | <a href="#">1381475_at</a>   | sidekick homolog 2 (chicken) (predicted)                                      | <a href="#">Info</a> | <a href="#">Sdk2_predicted</a>    |
| 356 | 0.0008775 | 0.0247925 | 169   | 29.1   | 5.808 | <a href="#">1385426_at</a>   | similar to hypothetical protein FLJ20647 (predicted)                          | <a href="#">Info</a> | <a href="#">RGD1305326_prec</a>   |
| 357 | 0.0008792 | 0.0247925 | 64.6  | 180.3  | 0.358 | <a href="#">1382183_at</a>   | Transcribed locus                                                             | <a href="#">Info</a> |                                   |
| 358 | 0.0008873 | 0.024946  | 116.9 | 338.3  | 0.346 | <a href="#">1398467_at</a>   | hypothetical LOC360644                                                        | <a href="#">Info</a> | <a href="#">LOC360644</a>         |
| 359 | 0.0008896 | 0.024946  | 129.1 | 291.1  | 0.443 | <a href="#">1392140_at</a>   | Transcribed locus                                                             | <a href="#">Info</a> |                                   |
| 360 | 0.0008946 | 0.0250165 | 380.1 | 110.9  | 3.427 | <a href="#">1379338_at</a>   |                                                                               | <a href="#">Info</a> |                                   |
| 361 | 0.0009038 | 0.0252038 | 88.6  | 155    | 0.572 | <a href="#">1396116_at</a>   | serologically defined colon cancer antigen 1 (predicted)                      | <a href="#">Info</a> | <a href="#">Sdccag1_predicted</a> |
| 362 | 0.0009291 | 0.0257262 | 524.1 | 224.4  | 2.336 | <a href="#">1372132_at</a>   | CNDP dipeptidase 2 (metallopeptidase M20 family) (predicted)                  | <a href="#">Info</a> | <a href="#">Cndp2_predicted</a>   |
| 363 | 0.0009298 | 0.0257262 | 28.3  | 15.1   | 1.874 | <a href="#">1371942_at</a>   | similar to Glutathione S-transferase, theta 3                                 | <a href="#">Info</a> | <a href="#">LOC499422</a>         |
| 364 | 0.0009302 | 0.0257262 | 144.9 | 284.8  | 0.509 | <a href="#">1370294_a_at</a> | cell division cycle 20 homolog (S. cerevisiae)                                | <a href="#">Info</a> | <a href="#">Cdc20</a>             |
| 365 | 0.0009329 | 0.0257301 | 62.5  | 20.3   | 3.079 | <a href="#">1384544_at</a>   | paraoxonase 3                                                                 | <a href="#">Info</a> | <a href="#">RGD:1302965</a>       |
| 366 | 0.0009404 | 0.0258661 | 23.7  | 42.2   | 0.562 | <a href="#">1393648_at</a>   | BTB (POZ) domain containing 4 (predicted)                                     | <a href="#">Info</a> |                                   |
| 367 | 0.0009457 | 0.0258722 | 450.3 | 682.1  | 0.66  | <a href="#">1371064_at</a>   | pericentriolar material 1                                                     | <a href="#">Info</a> | <a href="#">Pcm1</a>              |
| 368 | 0.0009465 | 0.0258722 | 325.2 | 209.6  | 1.552 | <a href="#">1390851_at</a>   |                                                                               | <a href="#">Info</a> |                                   |
| 369 | 0.0009503 | 0.0258722 | 71    | 125.5  | 0.566 | <a href="#">1369018_at</a>   | forkhead box M1                                                               | <a href="#">Info</a> | <a href="#">Foxm1</a>             |
| 370 | 0.0009509 | 0.0258722 | 533   | 1195.1 | 0.446 | <a href="#">1368712_at</a>   | zinc finger protein 386 (Kruppel-like)                                        | <a href="#">Info</a> | <a href="#">Znf386</a>            |
| 371 | 0.0009577 | 0.0259481 | 6.5   | 11.1   | 0.586 | <a href="#">1395372_at</a>   | Transcribed locus                                                             | <a href="#">Info</a> |                                   |
| 372 | 0.0009622 | 0.0259481 | 125.8 | 229.6  | 0.548 | <a href="#">1374181_at</a>   | similar to heterogeneous nuclear ribonucleoprotein G - human                  | <a href="#">Info</a> | <a href="#">LOC302855</a>         |
| 373 | 0.0009638 | 0.0259481 | 70.5  | 157.7  | 0.447 | <a href="#">1374805_at</a>   | similar to hypothetical protein MGC5528                                       | <a href="#">Info</a> | <a href="#">LOC299933</a>         |
| 374 | 0.000964  | 0.0259481 | 417.1 | 855.2  | 0.488 | <a href="#">1383336_at</a>   | similar to pinin                                                              | <a href="#">Info</a> | <a href="#">LOC368070</a>         |
| 375 | 0.0009739 | 0.0261287 | 95.8  | 64.3   | 1.49  | <a href="#">1393229_at</a>   | silver (predicted)                                                            | <a href="#">Info</a> | <a href="#">Si_predicted</a>      |
| 376 | 0.0009759 | 0.0261287 | 481.7 | 696.2  | 0.692 | <a href="#">1373214_at</a>   | KDEL (Lys-Asp-Glu-Leu) containing 1 (predicted)                               | <a href="#">Info</a> | <a href="#">Kdelc1_predicted</a>  |
| 377 | 0.0009845 | 0.026289  | 44.5  | 26.1   | 1.705 | <a href="#">1383692_at</a>   |                                                                               | <a href="#">Info</a> |                                   |
| 378 | 0.0009946 | 0.0264885 | 81.8  | 29.8   | 2.745 | <a href="#">1376790_at</a>   | Galactosylceramidase                                                          | <a href="#">Info</a> | <a href="#">Galc</a>              |

|     |           |           |      |       |       |                            |                   |                      |
|-----|-----------|-----------|------|-------|-------|----------------------------|-------------------|----------------------|
| 379 | 0.0009987 | 0.0265275 | 50.2 | 101.9 | 0.493 | <a href="#">1391808_at</a> | Transcribed locus | <a href="#">Info</a> |
|-----|-----------|-----------|------|-------|-------|----------------------------|-------------------|----------------------|

---

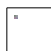

---

**Date and time of the analysis:**

Name of the project file: ProjectRMA\_BRB.xls

Time of the analysis: Fri Sep 22 04:36:37 2006

BRB-ArrayTools Version: 3.4

---

**Filtering parameters:**

- **Spot Filters: OFF**
  - **Normalization: OFF**
  - **Exclude a gene under any of the following conditions:**  
p-value of the log-ratio variation in greater than 0.05
  - **Gene Subsets: OFF**
- 

[View expression of significant genes.](#)
